# Supplementary material for: Treatment-free remission following frontline nilotinib in patients with chronic myeloid leukemia in chronic phase: results from the ENESTfreedom study
Source: PubMed Central journal article supplement (PMC5508077; doi:10.1038/leu.2017.63), 2017-03-17
Supplement: leu201763x1.pdf [file leu201763x1.pdf]

1 **Supplementary Appendix**

- 2 Supplement to Hochhaus A, Masszi T, Giles FJ, et al. Treatment-Free Remission Following  
3 Frontline Nilotinib in Patients With Chronic Myeloid Leukemia in Chronic Phase: Results From  
4 the ENESTfreedom Study

5 **Supplementary Methods**

6 *Patients, study design, and treatment*

7 During the 1-year continuation phase, molecular responses were evaluated every 12 weeks.  
8 Patients who entered the continuation phase were allowed to stop nilotinib treatment in the  
9 treatment-free remission (TFR) 2 (TFR-2) phase if they sustained a deep molecular response  
10 (DMR), defined as MR<sup>4.5</sup> ( $BCR-ABL1 \leq 0.0032\%$  on the International Scale [ $BCR-ABL1^{IS}$ ]) in  
11 the last assessment, no assessment worse than MR<sup>4</sup> ( $BCR-ABL1^{IS} \leq 0.01\%$ ), and  $\leq 2$  assessments  
12 between MR<sup>4</sup> and MR<sup>4.5</sup>, during the continuation phase. Patients in the continuation phase who  
13 are ineligible to enter the TFR-2 phase will remain on nilotinib treatment until 192 weeks after  
14 the last patient entered the TFR phase or until discontinuation due to intolerable toxicity, disease  
15 progression, investigator discretion, or withdrawal of consent.

16 **Figure S1.** Kaplan-Meier estimate of treatment-free survival<sup>a</sup> among patients who remained in  
 17 the TFR phase for  $\geq 24$  weeks.

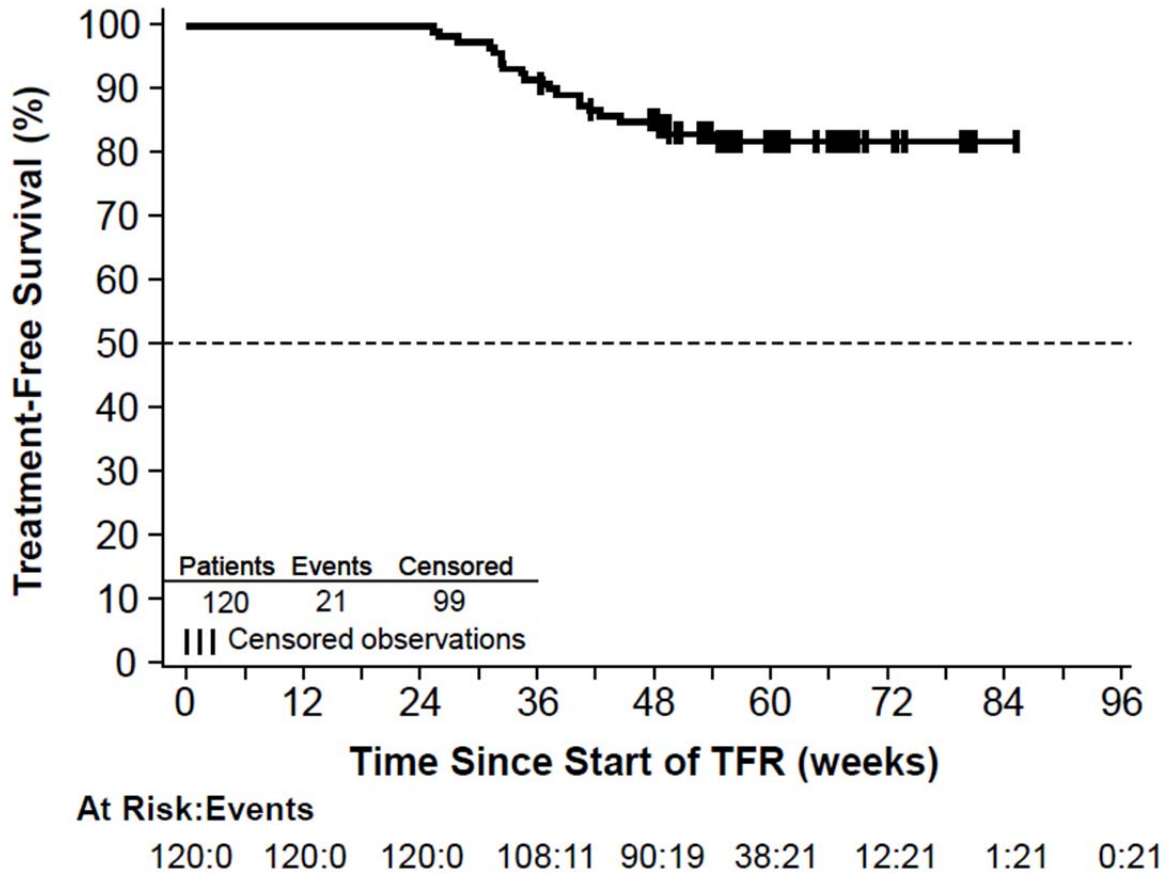

18  
 19 TFR, treatment-free remission.  
 20 <sup>a</sup> Treatment-free survival was defined as the time from the start of TFR until the earliest of any  
 21 of the following: loss of major molecular response ( $BCR-ABL1 \leq 0.1\%$  on the International  
 22 Scale), reinitiation of nilotinib for any reason, progression to accelerated phase/blast crisis, or  
 23 death due to any cause.

24 **Table S1.** Baseline characteristics of patients according to TFR status at 48 weeks

|                                                                                                   | <b>Patients<br/>Remaining in<br/>TFR at 48 Weeks<br/>(n = 98)</b> | <b>Patients No<br/>Longer in TFR at<br/>48 Weeks<br/>(n = 92)</b> |
|---------------------------------------------------------------------------------------------------|-------------------------------------------------------------------|-------------------------------------------------------------------|
| Age, median (range), years                                                                        | 53.0 (21-83)                                                      | 56.5 (23-86)                                                      |
| Sex, %                                                                                            |                                                                   |                                                                   |
| Female                                                                                            | 53.1                                                              | 45.7                                                              |
| Male                                                                                              | 46.9                                                              | 54.3                                                              |
| Time from achievement of MR <sup>4.5</sup> to study entry,<br>median (range), months <sup>a</sup> | 19.3 (0.4-70.9) <sup>b</sup>                                      | 16.9 (0.3-33.4) <sup>b</sup>                                      |
| Duration of nilotinib prior to study entry, median<br>(range), months <sup>a</sup>                | 31.7 (21.2-76.6) <sup>c</sup>                                     | 31.2 (24.0-47.9) <sup>c</sup>                                     |

25 MR<sup>4.5</sup>, molecular response 4.5 (*BCR-ABL1* ≤ 0.0032% on the International Scale); TFR,  
26 treatment-free remission.

27 <sup>a</sup> Per protocol, there was a fixed duration of 52 weeks between study entry and entry into the  
28 TFR phase. Thus, the total durations of MR<sup>4.5</sup> and nilotinib treatment increased similarly for all  
29 patients between the time of study entry and entry into the TFR phase.

30 <sup>b</sup> The interquartile range for time from achievement of MR<sup>4.5</sup> to study entry was similar in  
31 patients remaining in TFR (4.2-26.0 months) and in those no longer in TFR (1.5-21.3 months) at  
32 48 weeks.

33 <sup>c</sup> The interquartile range for duration of nilotinib prior to study entry was similar in patients  
34 remaining in TFR (27.8-35.0 months) and in those no longer in TFR (27.1-33.9 months) at 48  
35 weeks.

36 **Table S2.** TFR rate according to baseline characteristics

| Patients, n/N (%) <sup>a</sup>                                           | TFR Rate at 48 Weeks |
|--------------------------------------------------------------------------|----------------------|
| Age <sup>b</sup>                                                         |                      |
| < 55 years                                                               | 51/94 (54.3)         |
| ≥ 55 years                                                               | 47/96 (49.0)         |
| Sex                                                                      |                      |
| Female                                                                   | 52/94 (55.3)         |
| Male                                                                     | 46/96 (47.9)         |
| Time from achievement of MR <sup>4.5</sup> to study entry <sup>b,c</sup> |                      |
| < 18.3 months                                                            | 45/95 (47.4)         |
| ≥ 18.3 months                                                            | 53/95 (55.8)         |
| Duration of nilotinib prior to study entry <sup>b,c</sup>                |                      |
| < 31.4 months                                                            | 47/94 (50.0)         |
| ≥ 31.4 months                                                            | 51/96 (53.1)         |

37 MR<sup>4.5</sup>, molecular response 4.5 (*BCR-ABL1* ≤ 0.0032% on the International Scale); TFR,  
 38 treatment-free remission.

39 <sup>a</sup> Rates of patients remaining in TFR at 48 weeks are shown as a percentage of patients within  
 40 each subgroup.

41 <sup>b</sup> Subgroups were defined based on the median values for each parameter.

42 <sup>c</sup> Per protocol, there was a fixed duration of 52 weeks between study entry and entry into the  
 43 TFR phase. Thus, the total durations of MR<sup>4.5</sup> and nilotinib treatment increased similarly for all

44 patients between the time of study entry and entry into the TFR phase; therefore, this 52-week  
45 period did not impact this analysis.
